# Supplementary material for: Topical or oral antibiotics for children with acute otitis media presenting with ear discharge: study protocol of a randomised controlled non-inferiority trial
Source: HighWire-hosted journal article supplement (doi:10.1136/bmjopen-2021-052128), 2021-12-01
Supplement: bmjopen-2021-052128supp001_data_supplement.pdf [file bmjopen-2021-052128supp001_data_supplement.pdf]

PLOTS-studie proefpersoneninformatie en toestemmingsformulier

## Proefpersoneninformatie en toestemmingsformulier voor deelname aan medisch-wetenschappelijk onderzoek

### PLOTS: Pijnlijk Loopoor Therapie Studie

*Wat is de beste behandeling van een loopoor bij kinderen met een middenoorontsteking: antibioticumoordruppels of een antibioticumdrankje?*

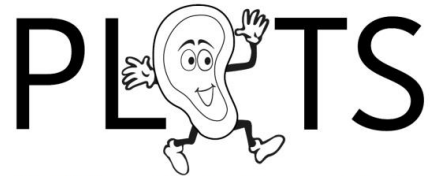

Pijnlijk Loopoor Therapie Studie

### Inleiding

Geachte heer/mevrouw,

Uw huisarts heeft u verteld over ons onderzoek naar de beste behandeling van een acute middenoorontsteking met een loopoor. We willen vragen of u met uw kind mee zou willen doen aan dit medisch-wetenschappelijk onderzoek. Meedoen is vrijwillig. Om mee te doen is wel uw schriftelijke toestemming nodig. U leest hier om wat voor onderzoek het gaat, wat het voor u betekent, en wat de voordelen en nadelen zijn. Het is veel informatie. Wilt u de informatie doorlezen en beslissen of u wilt meedoen? Als u wilt meedoen, kunt u het formulier invullen dat u vindt in bijlage **C**.

### Stel uw vragen

U kunt uw beslissing nemen met de informatie die u in deze informatiebrief vindt. Daarnaast raden we u aan om dit te doen:

- Stel vragen aan de onderzoeker die u deze informatie geeft.
- Praat met uw partner, familie of vrienden over dit onderzoek.
- Stel vragen aan de onafhankelijk deskundige, F.G.W. Cleveringa, zie bijlage **A** voor zijn contactgegevens.
- Lees de informatie op [www.rijksoverheid.nl/mensenonderzoek](http://www.rijksoverheid.nl/mensenonderzoek).

### 1. Algemene informatie

Het UMC Utrecht heeft dit onderzoek opgezet. Uw huisarts heeft u deze brief meegegeven. Voor dit onderzoek zijn 350 patiënten nodig. De Medisch Ethische Toetsingscommissie Utrecht heeft dit onderzoek goedgekeurd.

### 2. Wat is het doel en achtergrond van het onderzoek?

Dit onderzoek gaat over de beste behandeling van een acute middenoorontsteking bij kinderen die hierbij een loopoor hebben. Een acute middenoorontsteking is een ontsteking van de holte achter het trommelvlies, het wordt veroorzaakt door een verkoudheidsvirus of -bacterie. Normaal gesproken is de middenoorholte gevuld met lucht, maar bij een middenoorontsteking vult deze zich met ontstekingsvocht. Bij ongeveer één op de vijf kinderen met een middenoorontsteking ontstaat er een scheurtje in het trommelvlies en loopt het ontstekingsvocht via de gehoorgang het oor uit, dit noemen

### PLOTS-studie proefpersoneninformatie en toestemmingsformulier

we een loopoor. Eerdere onderzoeken hebben aangetoond dat een antibioticumdrankje een gunstig effect kan hebben op het herstel van de koorts en de oorpijn die zo'n ontsteking kan veroorzaken. Veel huisartsen schrijven daarom zo'n drankje voor bij kinderen met een loopoor. In deze studie willen we onderzoeken of er alternatieven zijn voor een antibioticumdrankje: we vergelijken het nut van een antibioticumdrankje met dat van antibioticumoordruppels. In totaal zullen 350 kinderen met een loopoor als gevolg van een acute middenoorontsteking meedoen en 3 maanden worden gevolgd.

### 3. Welke behandelingen worden onderzocht?

De deelnemende kinderen worden door middel van loting over twee groepen verdeeld: de eerste groep krijgt antibioticum-corticosteroïd oordruppels (Bacicoline B oordruppels 3 maal daags 5 druppels), de tweede groep krijgt een antibioticumdrankje (amoxicilline 50mg/kg/dag verdeeld over 3 doses). Beide behandelingen duren één week.

### 4. Hoe verloopt het onderzoek?

#### *Hoelang duurt het onderzoek?*

Doet u kind mee met het onderzoek? Dan duurt dat in totaal 3 maanden.

#### *Hoe wordt het onderzoek uitgevoerd?*

- ✓ Uw huisarts controleert of uw kind in aanmerking komt voor studiedeelname;
- ✓ Uw huisarts geeft – met uw goedkeuring – uw gegevens door aan het onderzoeksteam in het Universitair Medisch Centrum (UMC) Utrecht en geeft u deze informatiefolder mee;
- ✓ Het onderzoeksteam neemt telefonisch contact met u op en één van de onderzoekers bezoekt u thuis op diezelfde dag;
- ✓ **Het eerste huisbezoek** duurt circa een uur. Tijdens het bezoek worden mogelijke vragen die u heeft beantwoord, worden toestemmingsformulieren getekend en aan het eind van dit bezoek krijgt uw kind na loting het antibioticumdrankje of de oordruppels van de arts-onderzoeker (zie "Het eerste huisbezoek");
- ✓ We vragen u om gedurende **2 weken** elke dag een **klachtendagboekje** bij te houden;
- ✓ De onderzoeker belt u na ongeveer **3 dagen** op om het dagboekje en eventuele vragen te bespreken;
- ✓ **Na 2 weken volgt een tweede huisbezoek.** Dit controle bezoek duurt ongeveer een half uur (zie "Het tweede huisbezoek na 2 weken");
- ✓ Na dit huisbezoek vragen we u om wekelijks **een vervolgdagboekje** in te vullen tot het einde van de studie, dat wil zeggen in totaal **3 maanden**. We vragen u om dit vervolgdagboekje aan het einde in een retourenvelop per post naar ons toe te sturen.
- ✓ Gedurende de studie zullen we enkele keren (telefonisch) contact met u opnemen om het dagboekje te bespreken en eventuele vragen te beantwoorden.

## PLOTS-studie proefpersoneninformatie en toestemmingsformulier

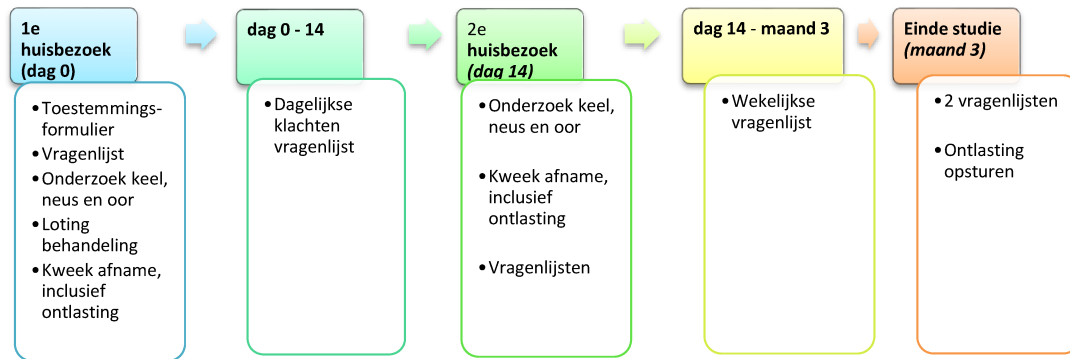Het eerste huisbezoek

Tijdens dit bezoek wordt de gang van zaken van het onderzoek nader uitgelegd en kunt u vragen stellen over het onderzoek. Pas daarna besluit u of u met uw kind wilt deelnemen aan het onderzoek.

Als u inderdaad besluit om mee te doen vragen we aan beide ouders om een toestemmingsformulier te ondertekenen. De onderzoeker ondertekent dit formulier ook. Indien één van de ouders tijdens het eerste huisbezoek niet aanwezig is, zal van de betreffende ouder mondeling toestemming worden gevraagd. Alleen indien deze ook (mondelinge) toestemming geeft voor deelname, kan uw kind deelnemen aan het onderzoek. In het betreffende geval zal een extra proefpersoneninformatie en toestemmingsformulier bij u thuis worden achtergelaten om door de andere ouder te laten ondertekenen. Het getekende formulier zal tijdens het tweede huisbezoek worden meegenomen.

Hierna doet de arts-onderzoeker het volgende onderzoek:

- neemt een vragenlijst met u door;
- onderzoekt de keel, neus en oren van uw kind;
- neemt een kweekvatje uit het oor en de neus-keelholte van uw kind voor onderzoek naar ziektekiemen.

We vragen u ook om een portie ontlasting van uw kind op te vangen voor onderzoek naar gevoeligheid voor antibiotica van bacteriën in de darmen.

De volgende twee *schuin gedrukte* deelonderzoeken worden alleen bij een beperkt aantal kinderen (twee groepen van in totaal 25 kinderen) verricht. Indien dit voor uw kind van toepassing is, zal de arts-onderzoeker dat expliciet met u bespreken. Hier wordt ook extra toestemming voor gevraagd.

- *de arts-onderzoeker neemt een kweekvatje uit het oor van uw kind én vraagt bij dit deelonderzoek of u ook een kweekvatje uit het oor wilt afnemen, zodat kan worden onderzocht of de ziektekiemen in beide gevallen overeenkomen.*
- *de arts-onderzoeker neemt, in plaats van één kweekvatje, bij dit deelonderzoek twee kweekvatjes uit het oor van uw kind. Eén kweekvatje wordt per post opgestuurd en het andere kweekvatje vervoert de arts-onderzoeker zelf naar het onderzoekscentrum. Hiermee kan*

## PLOTS-studie proefpersoneninformatie en toestemmingsformulier

*worden onderzocht of de manier van vervoeren naar het onderzoekscentrum van invloed is op de gevonden ziektekiemen.*

Aan het einde van het eerste huisbezoek zal de arts-onderzoeker via internet contact opnemen met het onderzoekscentrum in het UMC Utrecht om te zien wat het resultaat is van de loting die bepaalt welke behandeling uw kind krijgt. Dit geven wij door aan uw huisarts. U krijgt tijdens het bezoek de oordruppels of het drankje van de arts-onderzoeker.

### Het tweede huisbezoek na 2 weken

Aan het einde van het eerste huisbezoek maken we een afspraak met u voor een controlebezoek door een onderzoeker bij u thuis 2 weken later. Tijdens deze controle wordt opnieuw een vragenlijst doorgenomen en worden de keel, neus en oren van uw kind onderzocht. Als het oor nog (of weer) loopt wordt opnieuw een kweekvatje uit het oor genomen voor onderzoek naar ziektekiemen. Daarnaast wordt er opnieuw een kweekvatje uit de neus-keelholte afgenomen en vragen we u ook om een nieuwe portie ontlasting van uw kind op te vangen. Dit controlebezoek duurt ongeveer een half uur.

## 5. Welke afspraken maken we met u?

We willen graag dat het onderzoek goed verloopt. Daarom maken we de volgende afspraken met u:

- U geeft u kind de studiemedicatie op de manier de manier die de onderzoeker u heeft uitgelegd.
- Uw kind doet tijdens dit onderzoek niet mee aan ander medisch-wetenschappelijk onderzoek.
- U bewaart de deelnemerskaart van het onderzoek bij uw kind. Hierop staat dat uw kind meedoet aan dit onderzoek. En wie men moet waarschuwen bij een noodsituatie. Laat deze kaart zien als uw kind bij een andere arts komt.
- U neemt contact op met de onderzoeker indien:
  - Uw kind in een ziekenhuis wordt opgenomen of behandeld
  - U niet meer wilt meedoen met het onderzoek.
  - Uw telefoonnummer, adres of e-mailadres verandert.

## 6. Welke bijwerkingen kunt u verwachten?

Alle werkzame medicijnen kunnen bijwerkingen hebben. Ongeveer één op de vijf kinderen die vanwege een middenoorontsteking een antibioticumdrankje nemen, krijgt last van diarree, overgeven of huiduitslag. Heel soms ontstaat een ernstige allergische reactie, we adviseren u dan om direct contact op te nemen met een (huis)arts.

De kinderen die oordruppels krijgen voorgeschreven vermijden de bovengenoemde bijwerkingen van een antibioticumdrankje. In de bijsluiter van oordruppels staat dat er een kans is op overgevoeligheidsreacties. Verder blijkt uit proefdieronderzoek dat er mogelijk een beschadiging van het binnenoer kan optreden met blijvend gehoorverlies. De oordruppels worden echter wel veel gebruikt door huisartsen en KNO-artsen, omdat het geschatte risico hierop ongeveer 1 tot 3 op de

**PLOTS-studie proefpersoneninformatie en toestemmingsformulier**

10.000 kinderen is en dat is lager dan het risico op gehoorbeschadiging door de middenoorontsteking zelf. In de bijsluiter van de oordruppels staat verder vermeld dat deze medicatie niet gebruikt dient te worden bij een niet-intact trommelvlies (een gaatje of een buisje in het trommelvlies). Uit eerder onderzoek bij kinderen met buisjes en een loopoor blijkt dat de voordelen tegen de eventuele nadelen opwegen. KNO-artsen en huisartsen schrijven deze oordruppels dan ook veelvuldig voor bij deze groep kinderen. Met de huidige studie onderzoeken we of ook bij kinderen met een loopoor en een trommelvliesperforatie de voordelen van oordruppels opwegen tegen de eventuele nadelen.

Wat zijn de voordelen en de nadelen als uw kind meedoet aan het onderzoek?

Meedoen aan het onderzoek kan voordelen en nadelen hebben. Hieronder zetten we ze op een rij.

Denk hier goed over na, en praat erover met anderen.

Meedoen aan het onderzoek kan deze voordelen hebben;

- Als het blijkt dat de oordruppels niet slechter werken dan het antibioticumdrankje, dan zullen kinderen die oordruppels krijgen niet worden blootgesteld aan de bijwerkingen van een antibioticumdrankje en daarnaast zullen zij een lager risico hebben op het ontwikkelen van antibiotica resistentie.

Meedoen aan het onderzoek kan deze nadelen hebben;

- Indien het blijkt dat de oordruppels minder goed werken dan het antibioticumdrankje, kan het zijn dat – in het geval dat uw kind ingeloot is in de oordruppel groep - uw kind als nog een behandeling met een antibioticumdrankje nodig heeft, waardoor de behandeling mogelijk langer duurt.
- Meedoen aan het onderzoek kost u extra tijd.
- U moet zich houden aan de afspraken die horen bij het onderzoek.

**7. Wat gebeurt er als u niet wenst deel te nemen aan dit onderzoek?**

U beslist zelf of u meedoet aan dit onderzoek. Deelname is geheel vrijwillig. Als u besluit niet mee te doen, hoeft u verder niets te doen. U hoeft niets te tekenen. U hoeft ook niet te zeggen waarom u niet wilt meedoen als u dat niet wilt. Uw kind krijgt dan gewoon de begeleiding en behandeling die hij/zij anders ook zou krijgen van uw huisarts. Indien u wel meedoet, kunt u, of kan uw kind, zich op ieder moment van de studie bedenken en toch stoppen zonder de reden te melden. Dit zal geen gevolgen hebben voor de behandeling van uw kind.

**8. Wat gebeurt er bij verzet van uw kind bij deelname aan het onderzoek?**

Het kan zijn dat uw kind zich tijdens het onderzoek verzet (niet meewerkt). De onderzoeker moet het onderzoek dan direct stoppen. Het is moeilijk om precies te omschrijven wat verzet is. Voor de start van het onderzoek wordt met u overlegd wat als verzet wordt gezien. De onderzoeker zal zich houden aan de Gedragscode 'Verzet van minderjarigen die deelnemen aan medisch-wetenschappelijk onderzoek' die door het NVK is vastgesteld.

**PLOTS-studie proefpersoneninformatie en toestemmingsformulier****9. Wanneer stopt het onderzoek?**

In deze situaties stopt voor uw kind het onderzoek:

- Alle onderzoekshandelingen zijn volgens het schema voorbij.
- U of uw kind wil(t) zelf stoppen met het onderzoek. Dat mag op ieder moment. Meld dit dan meteen bij de onderzoeker, de contactgegevens vind u in **bijlage A**. U hoeft er niet bij te vertellen waarom u stopt. Uw kind wordt op de gebruikelijke manier behandeld.
- De onderzoeker vindt het beter voor uw kind om te stoppen.
- Een van de volgende instanties besluit dat het onderzoek moet stoppen:
  - UMC Utrecht
  - de overheid, of
  - de medisch-ethische commissie die het onderzoek beoordeelt.

*Wat gebeurt er als uw kind stopt met het onderzoek?*

De onderzoekers gebruiken de gegevens die tot het moment van stoppen zijn verzameld.

Als er nieuwe informatie over het onderzoek is die belangrijk voor uw kind is, laat de onderzoeker dit aan u weten. U wordt dan gevraagd of uw kind blijft meedoen.

**10. Wat gebeurt er als het onderzoek is afgelopen?**

Na 3 maanden, als u de laatste vragenlijst heeft ingevuld, is het onderzoek voor u afgelopen. Na afloop van de hele studie, als de gegevens van alle 350 kinderen zijn verzameld en verwerkt, ontvangt u van ons bericht over het eindresultaat. We zullen deze resultaten daarnaast delen in wetenschappelijke tijdschriften, op internationale congressen, en doorvoeren in onze landelijke richtlijnen. Daarnaast gaan we, in overleg met een groep ouders, op zoek naar passende manieren om ook zoveel mogelijk ouders van kinderen te informeren.

**11. Wat gebeurt er met uw gegevens?**

*Doet uw kind mee met het onderzoek?*

Dan geeft u ook toestemming om de gegevens van uw kind te verzamelen, gebruiken en bewaren.

*Welke gegevens bewaren we?*

We bewaren deze gegevens:

- de naam, geslacht en geboortedatum van uw kind
- uw adres, telefoonnummer en emailadres
- gegevens over de gezondheid van uw kind
- (medische) gegevens die we tijdens het onderzoek verzamelen

*Welk lichaamsmateriaal bewaren we?*

*We bewaren de kweekvatjes uit het oor en de neus-keelholte en de ontlasting van uw kind.*

*Waarom verzamelen, gebruiken en bewaren we uw gegevens en lichaamsmateriaal?*

We verzamelen, gebruiken en bewaren uw gegevens om de vragen van dit onderzoek te kunnen beantwoorden. En om de resultaten te kunnen publiceren.

**PLOTS-studie proefpersoneninformatie en toestemmingsformulier***Hoe beschermen we uw privacy?*

Uw gegevens worden vertrouwelijk behandeld. Om uw privacy te beschermen geven wij uw gegevens een code. Op al uw gegevens zetten we alleen deze code. De sleutel van de code bewaren we op een beveiligde plek in het UMC Utrecht. Als we uw gegevens verwerken, gebruiken we steeds alleen die code. Ook in rapporten en publicaties over het onderzoek kan niemand terughalen dat het over u ging.

*Wie kunnen de gegevens van uw kind zien?*

Sommige personen kunnen wel de naam en andere persoonlijke gegevens van uw kind zonder code inzien. Dit zijn mensen die controleren of de onderzoekers het onderzoek goed en betrouwbaar uitvoeren. Deze personen kunnen bij de gegevens van uw kind komen:

- Een controleur die voor het UMC Utrecht werkt.
- Nationale toezichthoudende autoriteiten. Bijvoorbeeld de Inspectie Gezondheidszorg en Jeugd.
- De onderzoekers die contact met u opnemen.

Deze personen houden de gegevens van uw kind geheim. Wij vragen u voor deze inzage toestemming te geven.

*Hoelang bewaren we de gegevens en lichaamsmateriaal van uw kind?*

We bewaren de gegevens van uw kind 25jaar in het UMC Utrecht, volgens de Wet Medisch wetenschappelijk Onderzoek met mensen (WMO). Het lichaamsmateriaal zal maximaal 10 jaar worden bewaard. De onderzoeksgegevens en het lichaamsmateriaal worden na afloop van het onderzoek bewaard, zodat wij daar in een later stadium analyses op kunnen verrichten. Wellicht kunnen we daar later een ander onderzoek mee doen op het gebied van middenoorontstekingen. Ook is het mogelijk dat wij u in de toekomst opnieuw zouden willen benaderen voor onderzoek op het gebied van middenoorontstekingen. Als u niet opnieuw benaderd wilt worden, respecteren wij dat natuurlijk. U kunt uw keuze op het toestemmingsformulier aangeven. U kunt later altijd nog beslissen deze toestemming in te trekken.

Het kan zijn dat we voor dit onderzoek in de toekomst samenwerking met landen buiten de Europese Unie aan gaan. Uw gecodeerde gegevens en lichaamsmateriaal kunnen dan ook naar die landen worden gestuurd. In die landen gelden niet de privacyregels van de Europese Unie. Maar uw privacy zal op een gelijkwaardig niveau worden beschermd.

*Kunt u uw toestemming voor het gebruik van de gegevens van uw kind weer intrekken?*

U kunt uw toestemming voor het gebruik van de gegevens van uw kind op ieder moment intrekken. Dit geldt voor het gebruik in dit onderzoek en voor het gebruik in ander onderzoek. Maar let op: trekt u uw toestemming in, en hebben onderzoekers op dat moment al gegevens verzameld voor een onderzoek? Dan mogen zij deze gegevens nog wel gebruiken.

*Wilt u meer weten over uw privacy?*

## PLOTS-studie proefpersoneninformatie en toestemmingsformulier

- Wilt u meer weten over uw rechten bij de verwerking van persoonsgegevens? Kijk dan op [www.autoriteitpersoonsgegevens.nl](http://www.autoriteitpersoonsgegevens.nl).
- Heeft u vragen over uw rechten? Of heeft u een klacht over de verwerking van de persoonsgegevens van uw kind? Neem dan contact op met degene die verantwoordelijk is voor de verwerking van uw persoonsgegevens. Voor uw onderzoek is dat: UMC Utrecht. Zie bijlage A voor contactgegevens, en website.
- Als u klachten heeft over de verwerking van de persoonsgegevens van uw kind, raden we u aan om deze eerst te bespreken met het onderzoeksteam. U kunt ook naar de Functionaris Gegevensbescherming van het UMC Utrecht gaan. Of u dient een klacht in bij de Autoriteit Persoonsgegevens.

*Waar vindt u meer informatie over het onderzoek?*

Op de volgende website vindt u meer informatie over het onderzoek: [www.plots-studie.nl](http://www.plots-studie.nl)

### **12. Zijn er extra kosten/is er een vergoeding wanneer u besluit mee te doen aan dit onderzoek?**

Aan het onderzoek zijn voor u geen kosten verbonden. Er is geen vergoeding beschikbaar voor deelname, maar na afloop van ieder bezoek door de onderzoeker krijgt uw kind een klein cadeautje.

### **13. Is er een verzekering afgesloten voor dit onderzoek?**

De onderzoekers hebben in overeenstemming met de Wet Medisch-wetenschappelijk Onderzoek met mensen (WMO), een risicoverzekering afgesloten voor elke deelnemer. Voor meer informatie hierover verwijzen wij naar bijlage B.

### **14. We informeren uw huisarts en apotheker**

De onderzoeker belt de huisarts en apotheker van uw kind om te laten weten dat uw kind meedoet aan het onderzoek en welke behandeling uw kind krijgt. Dit is voor de veiligheid van uw kind.

### **15. Wie voert het onderzoek uit en hoe wordt dit gefinancierd?**

Het onderzoek wordt georganiseerd door het Julius Centrum voor Gezondheidswetenschappen en Eerstelijns Geneeskunde van het UMC Utrecht. Het project wordt uitgevoerd met medewerking van bijna 200 huisartspraktijken in Nederland. Dit onderzoek wordt gefinancierd door het programma Goed Gebruik Geneesmiddelen van ZonMw. Deze organisatie financiert gezondheidsonderzoek in opdracht van het Ministerie van Volksgezondheid, Welzijn en Sport (VWS), en de Nederlandse Organisatie voor Wetenschappelijk Onderzoek (NWO).

### **16. Wilt u verder nog iets weten?**

Als u vragen heeft over de gang van zaken rond het onderzoek dan kunt u contact opnemen met het onderzoeksteam via het telefoonnummer of emailadres dat aan het eind van deze informatiefolder genoemd staat.



**PLOTS-studie proefpersoneninformatie en toestemmingsformulier**

Wilt u graag een onafhankelijk advies over meedoen aan dit onderzoek? Dan kunt u terecht bij een onafhankelijke deskundige. Voor ons onderzoek is dat dr. F.G.W. Cleveringa, huisarts Gezondheidshuis Stadshagen te Zwolle, bereikbaar via 038-426 82 03.

**17. Hoe te handelen bij klachten?**

Als u klachten heeft kunt u dit melden aan de onderzoekers of aan uw eigen huisarts. Mocht u ontevreden zijn over de gang van zaken bij het onderzoek en een klacht willen indienen dan kunt u contact opnemen met de Klachtenbemiddeling van het UMC Utrecht (+31 88 755 62 08).

**18. Ondertekening toestemmingsformulier**

Wanneer u voldoende bedenktijd heeft gehad, wordt u gevraagd te beslissen over deelname aan dit onderzoek. Indien u toestemming geeft, zullen wij u vragen deze op de bijbehorende toestemmingsverklaring schriftelijk te bevestigen. Door uw schriftelijke toestemming geeft u aan dat u de informatie heeft begrepen en instemt met deelname aan het onderzoek.

Het handtekeningblad wordt door de arts-onderzoeker bewaard. U krijgt een kopie of een tweede exemplaar van deze toestemmingsverklaring.

**19. Bijlagen bij deze informatie**

- A. Contactgegevens
- B. Informatie over de verzekering
- C. Toestemmingsformulier(en)

Dank voor uw aandacht.

Met vriendelijke groet,

Drs. Saskia Hullegie, arts-onderzoeker

Professor dr. Roger AMJ Damoiseaux, huisarts

Professor dr. Anne GM Schilder, KNO-arts

Dr. Roderick P Venekamp, huisarts

Dr. Thijs MA van Dongen, huisarts in opleiding

**PLOTS-studie proefpersoneninformatie en toestemmingsformulier****Bijlage A: contactgegevens Julius centrum UMC Utrecht**Contactpersoon onderzoeksteam:

Naam: S. Hullegie, arts-onderzoeker

e-mail: [plots@umcutrecht.nl](mailto:plots@umcutrecht.nl)

tel. nummer: 06 14 02 5167

Bereikbaar: dagelijks tijdens kantooruren.

Onafhankelijk arts:

Dr. F.G.W. Cleveringa, huisarts

Huisartsenpraktijk Stad & Ambt

tel. nummer: 0527-241 290

Klachten:

Als u klachten heeft kunt u dit melden aan de onderzoeker of aan uw behandelend arts. Mocht u ontevreden zijn over de gang van zaken bij het onderzoek en een klacht willen indienen dan kunt u contact opnemen met de klachtenbemiddelaars. Deze zijn bereikbaar via tel. +31 88 755 62 08. Of digitaal via: <https://www.umcutrecht.nl/nl/een-klacht-indienen>

Functionaris voor de Gegevensbescherming van de instelling: [privacy@umcutrecht.nl](mailto:privacy@umcutrecht.nl)

Raadpleeg de website van het UMC Utrecht voor meer informatie over uw rechten:

<https://www.umcutrecht.nl/nl/ziekenhuis/privacy> .

**PLOTS-studie proefpersoneninformatie en toestemmingsformulier****Bijlage B: informatie over de verzekering**

Voor iedereen die meedoet aan dit onderzoek, heeft UMC Utrecht een verzekering afgesloten. De verzekering dekt schade door deelname aan het onderzoek. Dit geldt voor schade tijdens het onderzoek of binnen vier jaar na het einde ervan. Schade moet u binnen die vier jaar aan de verzekeraar hebben gemeld.

De verzekering dekt niet alle schade. Onderaan deze tekst staat in het kort welke schade niet wordt gedekt.

Deze bepalingen staan in het Besluit verplichte verzekering bij medisch-wetenschappelijk onderzoek met mensen. Dit besluit staat op [www.ccmo.nl](http://www.ccmo.nl), de website van de Centrale Commissie Mensgebonden Onderzoek (zie 'Bibliotheek' en dan 'Wet- en regelgeving').

Bij schade kunt u direct contact leggen met de verzekeraar.

De verzekeraar van het onderzoek is:

Naam: CNA Insurance Company Ltd  
Adres: Polarisavenue 140, 2132 JX Hoofddorp  
Telefoonnummer: 020 – 57 37 274  
Polisnummer: 10201366  
Contactpersoon: Mw. Esther van Herk

De verzekering biedt een dekking van € 650.000 per proefpersoon en maximaal € 5.000.000 voor het hele onderzoek en maximaal € 7.500.000 per jaar voor alle onderzoeken van dezelfde opdrachtgever.

De verzekering dekt de volgende schade **niet**:

- Schade door een risico waarover we u informatie hebben gegeven in deze brief. Maar dit geldt niet als het risico groter bleek te zijn dan we van tevoren dachten. Of als het risico heel onwaarschijnlijk was.
- Schade aan uw gezondheid die ook zou zijn ontstaan als u niet aan het onderzoek had meegedaan.
- Schade die ontstaat doordat u aanwijzingen of instructies niet of niet goed opvolgde.
- Schade aan de gezondheid van uw kinderen of kleinkinderen.
- Schade door een behandelmethode die al bestaat. Of door onderzoek naar een behandelmethode die al bestaat.

Deze bepalingen staan in het 'Besluit verplichte verzekering bij medisch-wetenschappelijk onderzoek met mensen 2015'. Dit besluit staat in de Wettenbank van de overheid (<https://wetten.overheid.nl>).

## PLOTS-studie proefpersoneninformatie en toestemmingsformulier

**Bijlage C: Toestemmingsformulier ouders of voogd****PLOTS: Pijnlijk Loopoor Therapie Studie**

*Wat is de beste behandeling van een loopoor bij kinderen met een middenoorontsteking: antibioticumdruppels of een antibioticumdrankje?*

Ik ben gevraagd om toestemming te geven voor deelname van de volgende persoon/mijn kind aan dit medisch-wetenschappelijke onderzoek:

Naam proefpersoon (kind): \_\_\_\_\_ Geboortedatum: \_\_\_\_ / \_\_\_\_ / \_\_\_\_\_

- Ik heb de informatiebrief voor de ouders/voogd gelezen. Ook kon ik vragen stellen. Mijn vragen zijn voldoende beantwoord. Ik had genoeg tijd om te beslissen of ik wil dat mijn kind meedoet.
- Ik weet dat meedoen vrijwillig is. Ook weet ik dat ik op ieder moment kan beslissen dat mijn kind toch niet meedoet. Daarvoor hoef ik geen reden te geven.
- Ik ga ermee akkoord dat deze persoon/mijn kind meedoet aan dit onderzoek.
- Ik geef toestemming voor gebruik van de gegevens/lichaamsmateriaal op de manier en voor de doelen die in de informatiebrief staan.
- Ik geef toestemming om de onderzoeksgegevens van mijn kind op de onderzoekslocatie nog 25 jaar na dit onderzoek te bewaren.
- Ik geef toestemming om het lichaamsmateriaal van mijn kind te bewaren. Mogelijk kan dit later ook nog voor ander/meer onderzoek worden gebruikt, zoals in de informatiebrief staat.
- Ik weet dat sommige mensen de gegevens van mijn kind kunnen inzien. Die mensen staan vermeld in deze informatiebrief.
- Ik geef toestemming om de huisarts en apotheker op de hoogte te brengen van deelname aan de studie.
  
- Ik geef  **wel**  
 **geen** toestemming om deze persoon/mijn kind na dit onderzoek opnieuw te benaderen voor een vervolgonderzoek
- Ik geef  **wel**  
 **geen** toestemming om de gegevens en/of lichaamsmateriaal van deze persoon/mijn kind te bewaren om dit te gebruiken voor ander onderzoek, zoals in de informatiebrief staat
- Ik wil  **wel**  
 **niet** geïnformeerd worden over de onderzoeksresultaten.

**PLOTS-studie proefpersoneninformatie en toestemmingsformulier**Naam ouder/voogd\*\*:

---

Handtekening: \_\_\_\_\_ Datum: \_\_\_\_ / \_\_\_\_ / \_\_\_\_\_

-----  
Naam ouder/voogd\*\*:

---

Handtekening: \_\_\_\_\_ Datum: \_\_\_\_ / \_\_\_\_ / \_\_\_\_\_

-----  
Ik verklaar hierbij dat ik bovengenoemde persoon/personen volledig heb geïnformeerd over het genoemde onderzoek.

Als er tijdens het onderzoek informatie bekend wordt die de toestemming van de ouder of voogd zou kunnen beïnvloeden, dan breng ik hem/haar daarvan tijdig op de hoogte.

Naam onderzoeker (of diens vertegenwoordiger):

---

Handtekening: \_\_\_\_\_ Datum: \_\_\_\_ / \_\_\_\_ / \_\_\_\_\_

-----  
\* Doorhalen wat niet van toepassing is.

\*\* Als het kind jonger dan 18 jaar is, ondertekenen de ouders die het gezag uitoefenen of de voogd dit formulier.

*De proefpersoon krijgt een volledige informatiebrief mee, samen met een kopie van het getekende toestemmingsformulier.*
